# Supplementary material for: A reactive iron napthalene complex provides convenient access to the Cp*Fe− synthon (Cp*C5Me5)
Source: Royal Society of Chemistry journal article supplement (doi:10.1039/b926986j), 2010-01-01
Supplement: b926986j.pdf [file b926986j.pdf]

## ELECTRONIC SUPPLEMENTARY INFORMATION

### A reactive iron naphthalene complex provides convenient access to the $\text{Cp}^*\text{Fe}^-$ synthon ( $\text{Cp}^* = \text{C}_5\text{Me}_5$ )

Robert Wolf,\* Eva-Maria Schnöckelborg

Institute of Inorganic and Analytical Chemistry, University of Münster, Corrensstraße 30, D-48149 Münster

#### 1. Graphical representation of the polymeric arrangement of **2** in the solid state.

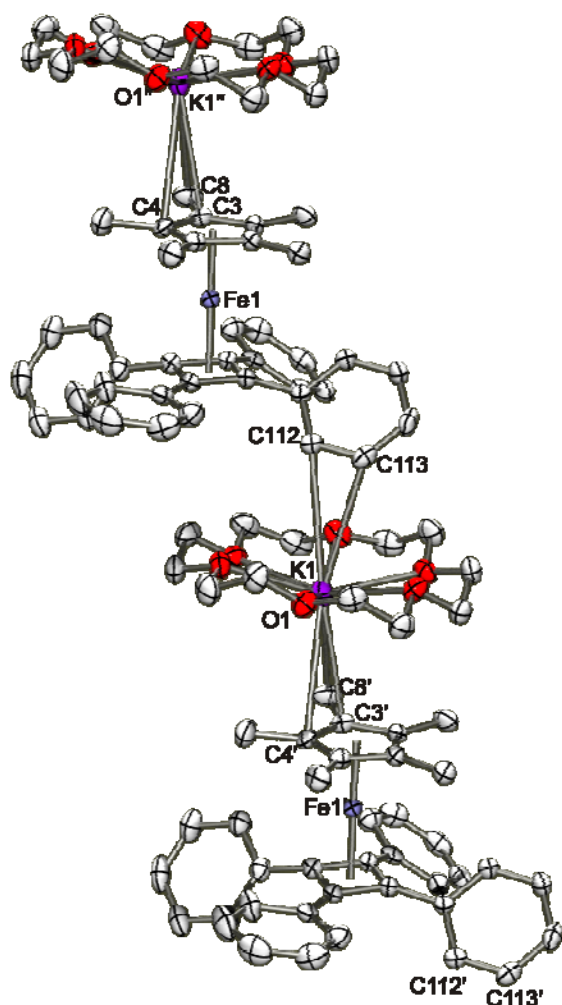

#### Selected bond lengths (Å):

K1–C112 3.539(3), K1–C113 3.478(3) Å  
K1–C3' 3.270(3) Å, K1–C4' 3.373(3) Å,  
K1–C8' 3.435(3) Å
